# Supplementary material for: Analysis of chromatin accessibility in decidualizing human endometrial stromal cells
Source: PubMed Central journal article supplement (PMC6040682; doi:10.1096/fj.201701098r), 2018-01-08
Supplement: fj.201701098R.sf2.pdf [file fj.201701098R.sf2.pdf]

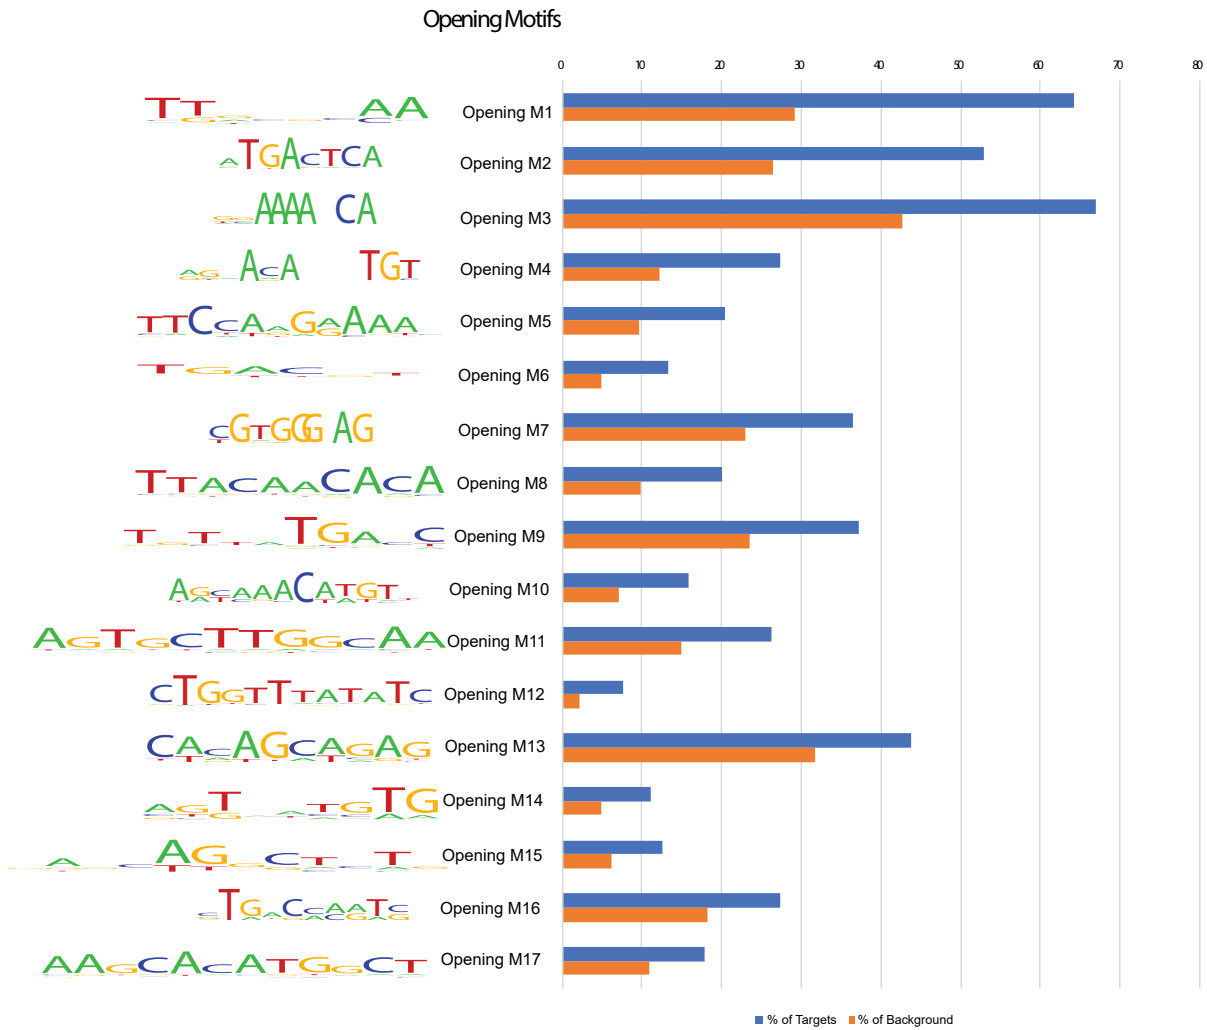

### Closing Motifs

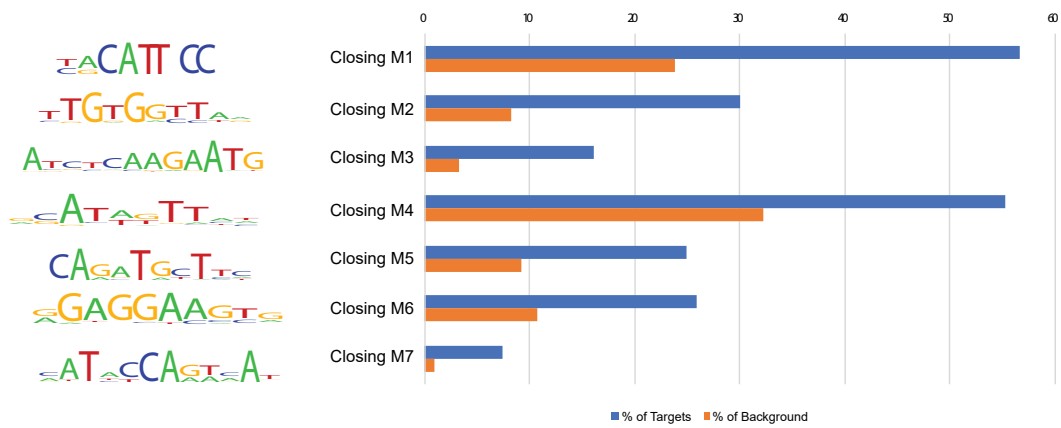

Figure S2. Full list of opening and closing motifs (expansion of Figure 2A)
