# Supplementary material for: Analysis of chromatin accessibility in decidualizing human endometrial stromal cells
Source: PubMed Central journal article supplement (PMC6040682; doi:10.1096/fj.201701098r), 2018-01-08
Supplement: fj.201701098R.sf3.pdf [file fj.201701098R.sf3.pdf]

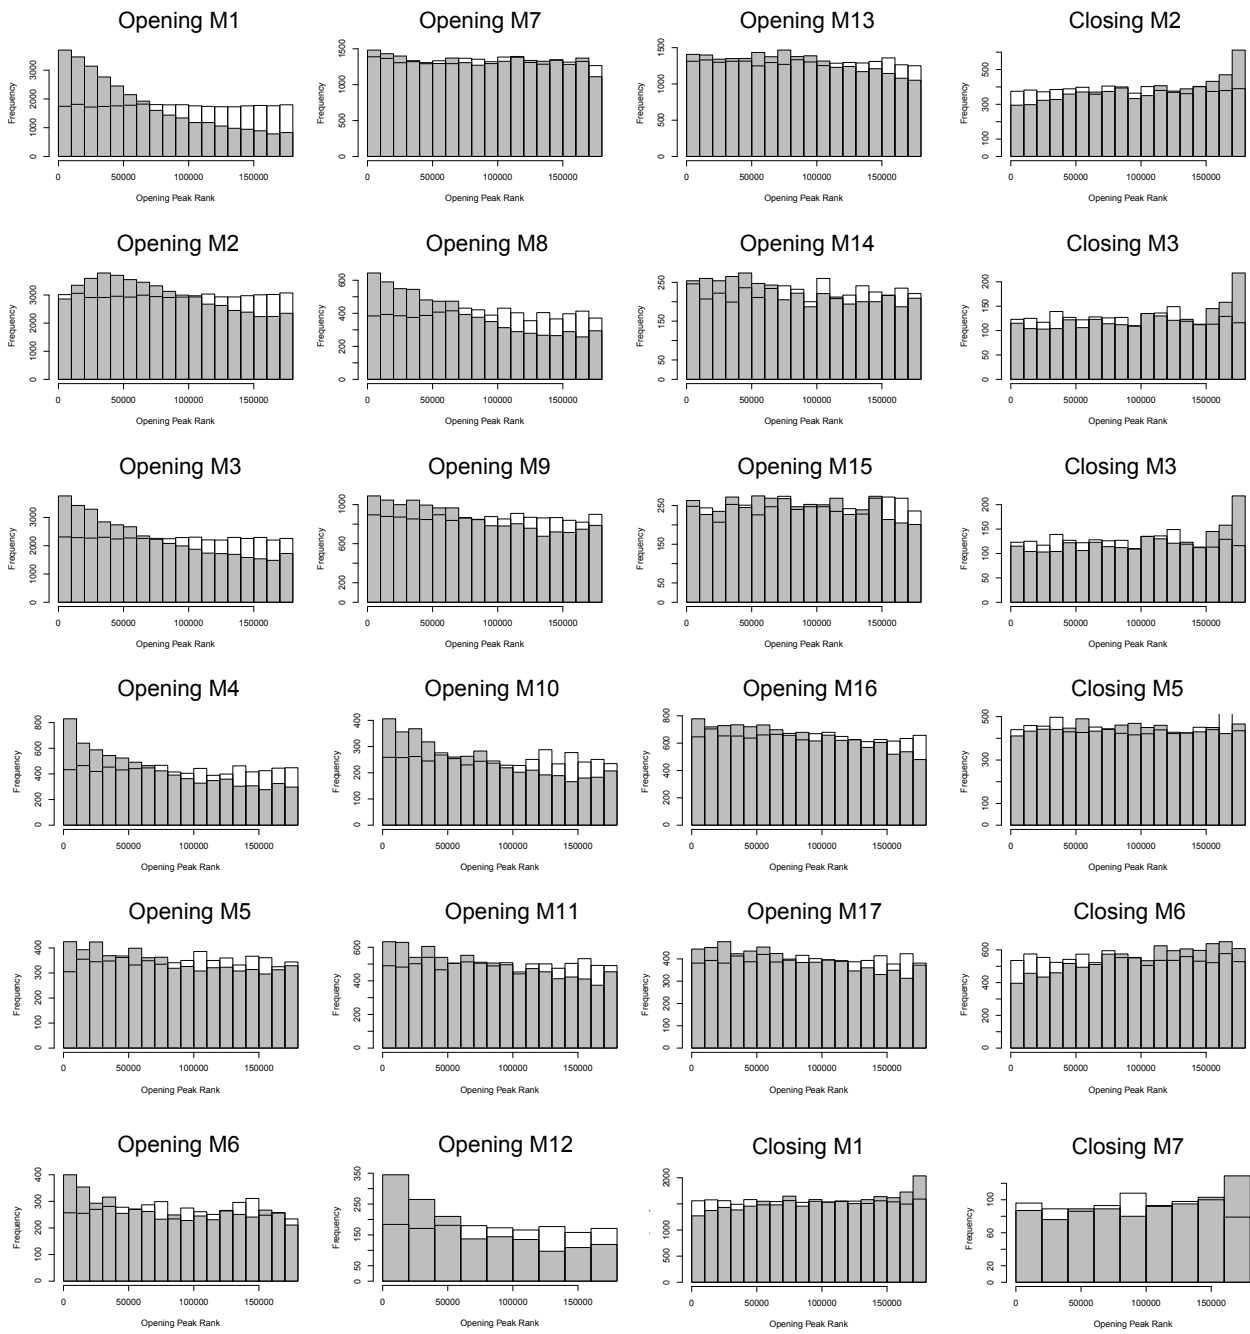

Figure S3. Association of motifs with chromatin opening or closing across entire ATAC-seq peak dataset for all motifs (expansion of Figure 2B)
