# Supplementary material for: Analysis of chromatin accessibility in decidualizing human endometrial stromal cells
Source: PubMed Central journal article supplement (PMC6040682; doi:10.1096/fj.201701098r), 2018-01-08
Supplement: fj.201701098R.sf4.pdf [file fj.201701098R.sf4.pdf]

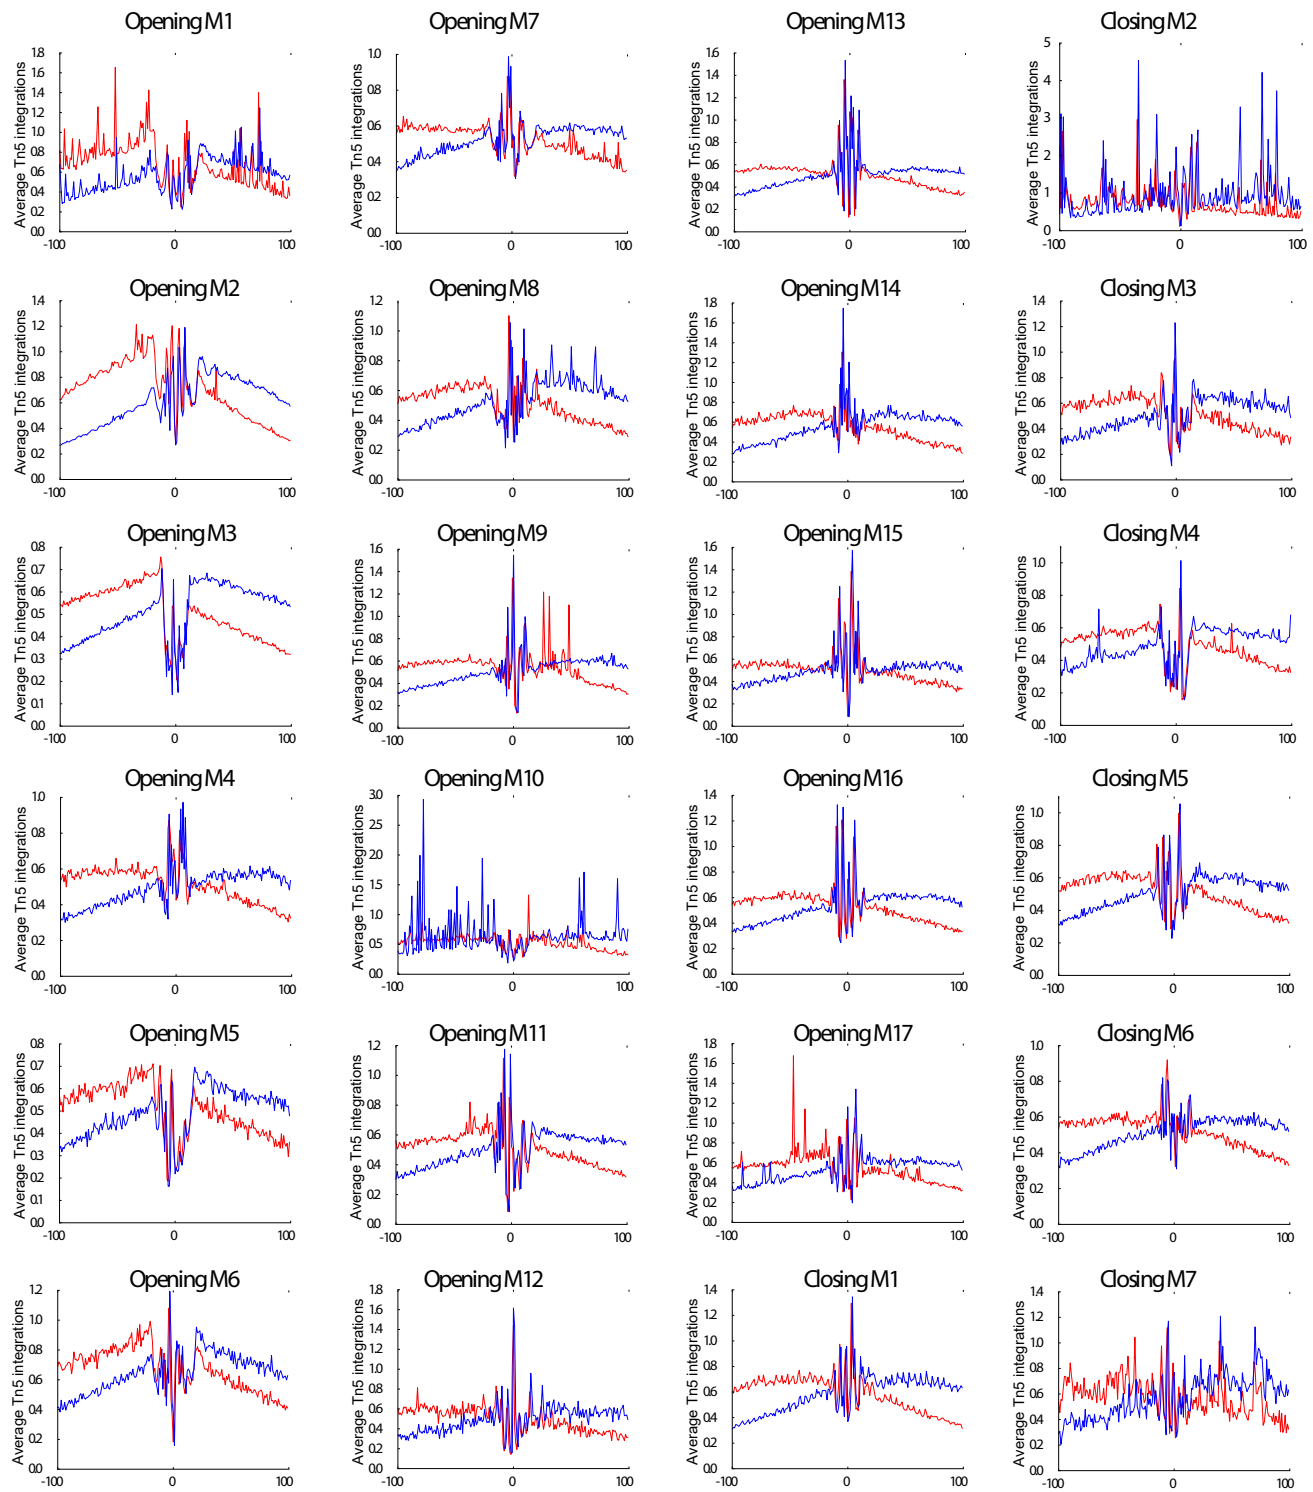

Figure S4. Average Tn5 integration patterns for all motifs (expansion of Figure 2C)
