# Supplementary material for: Analysis of chromatin accessibility in decidualizing human endometrial stromal cells
Source: PubMed Central journal article supplement (PMC6040682; doi:10.1096/fj.201701098r), 2018-01-08
Supplement: fj.201701098R.sf8.pdf [file fj.201701098R.sf8.pdf]

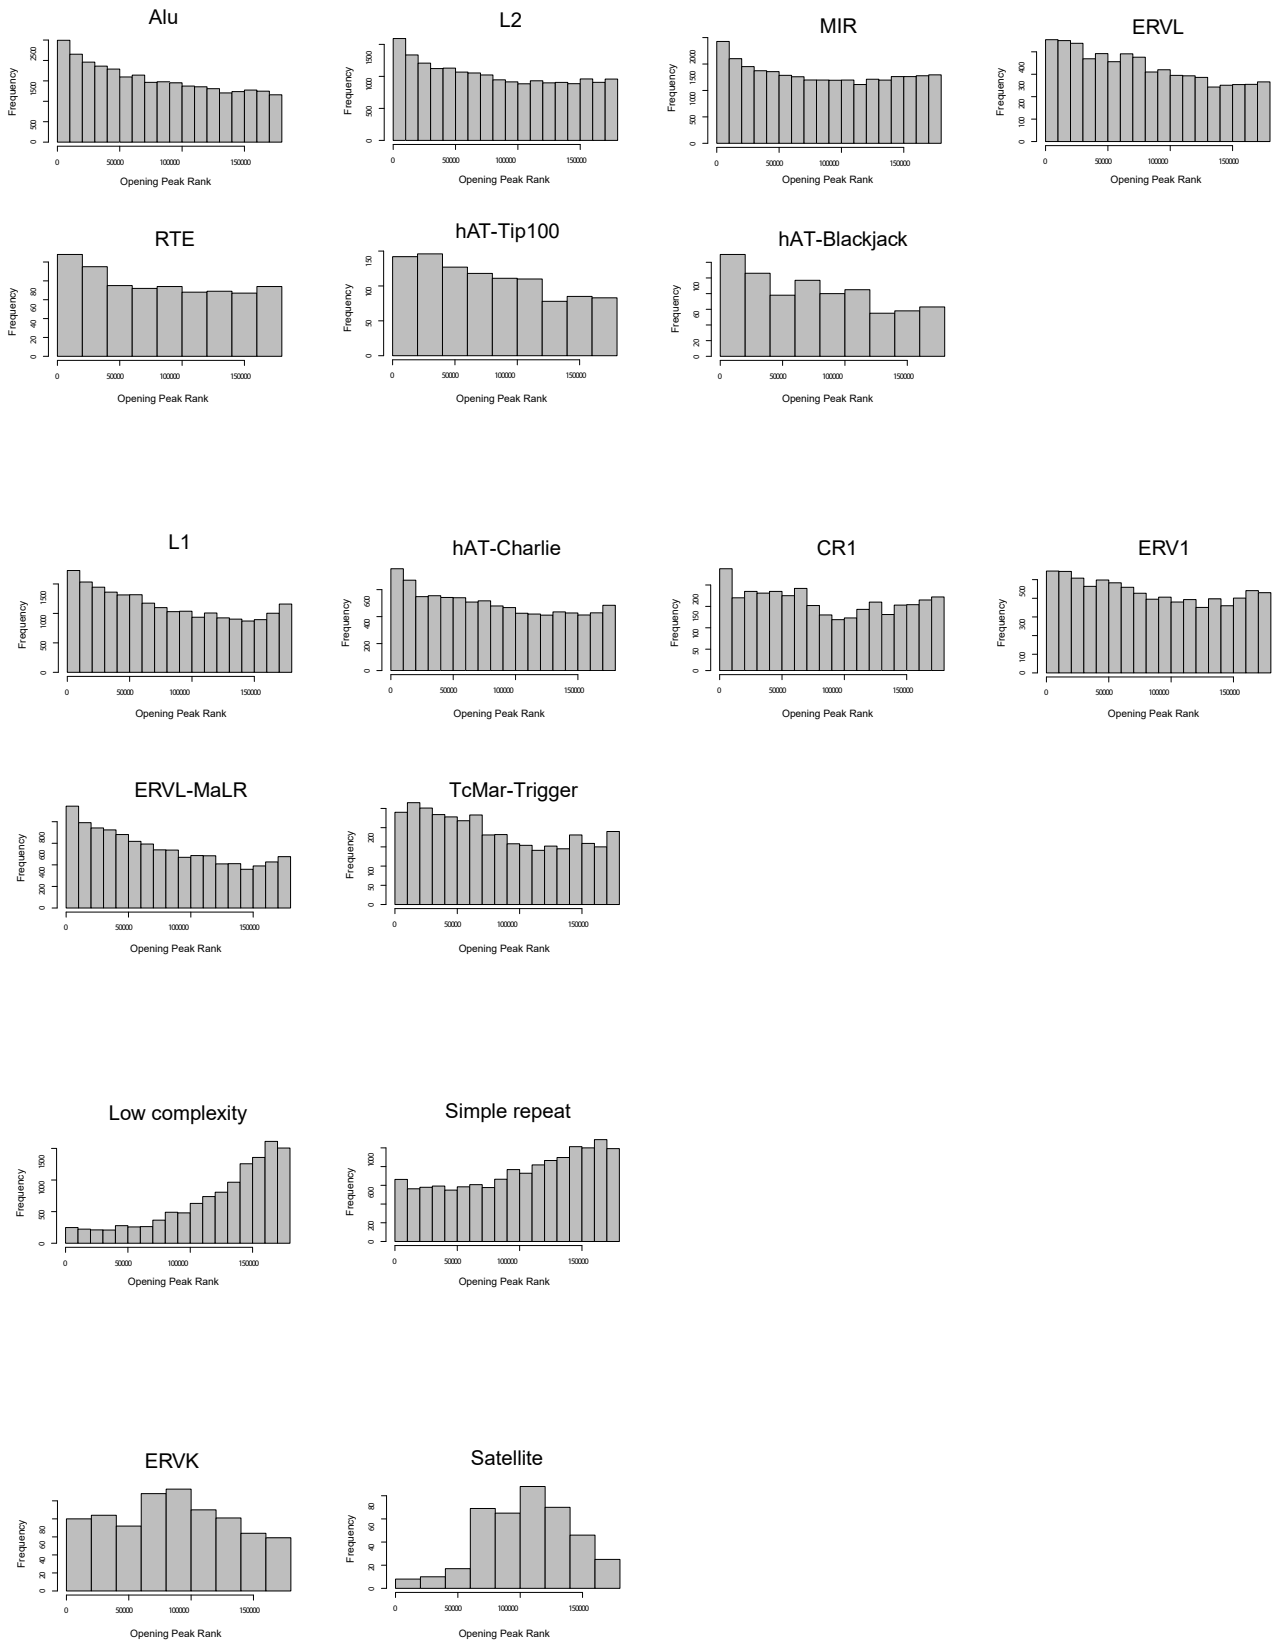

Figure S8. Association of other repetitive elements with opening and closing of chromatin (expansion of Figure 5B).
